# Supplementary material for: Delivery of self-amplifying RNA vaccines in in vitro reconstituted virus-like particles
Source: PubMed Central journal article supplement (PMC6548422; doi:10.1371/journal.pone.0215031), 2019-06-04
Supplement: pone.0215031.s001.pdf [file pone.0215031.s001.pdf]

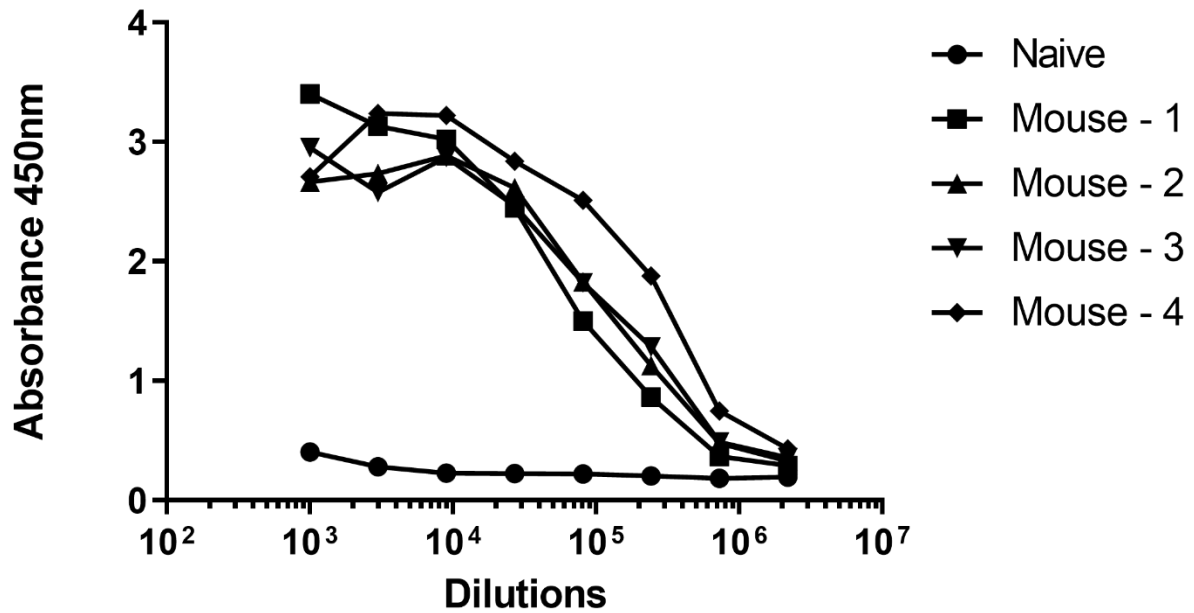

**Figure S1. Antibody Titers.** Four C57BL/6Tac mice were immunized subcutaneously with CCMV VLPs containing a non-translated RNA (20  $\mu\text{g}$ /per mouse/per immunization) on weeks 0, 2, and 4. Sera were tested for binding to CCMV VLPs 1 week after the 3<sup>rd</sup> immunization. Pre-immune serum (“Naïve”) was used as a negative control.
