# Supplementary material for: Delivery of self-amplifying RNA vaccines in in vitro reconstituted virus-like particles
Source: PubMed Central journal article supplement (PMC6548422; doi:10.1371/journal.pone.0215031), 2019-06-04
Supplement: pone.0215031.s003.pdf [file pone.0215031.s003.pdf]

## SIINFEKL responsive CD8<sup>+</sup> T cells

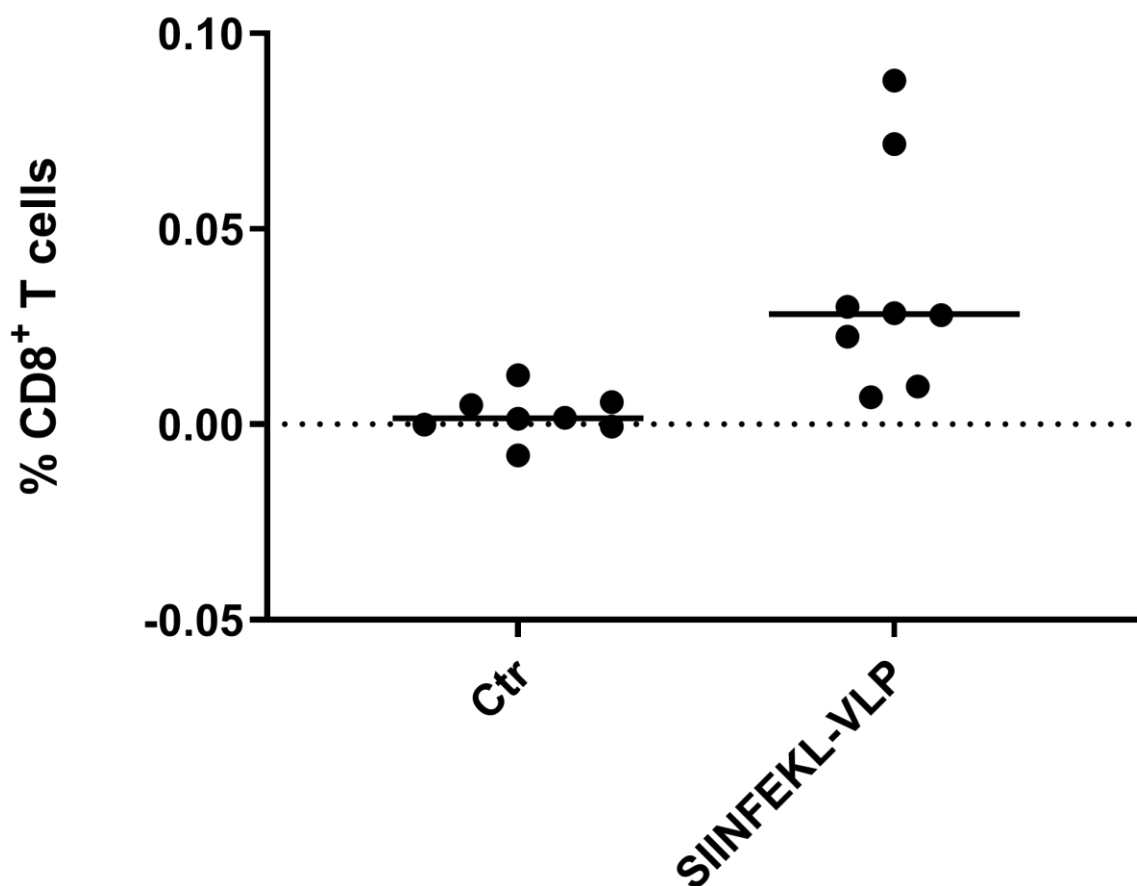

**Figure S3. Cytokine production of SIINFEKL responsive CD8<sup>+</sup> T cells.** T-cells were stimulated with SIINFEKL peptide for 6 hours. The amount of INF $\gamma$  and TNF $\alpha$  double-positive cells is shown as percentage of total CD8<sup>+</sup> T cells. Samples analyzed in this assay have been obtained from the same animal experiment described in Figure 7, with “Ctr” and “SIINFEKL-VLP” denoting the multiple vaccinations involving buffer-solution and OVA-replicon-VLP, respectively.
