# Supplementary material for: Delivery of self-amplifying RNA vaccines in in vitro reconstituted virus-like particles
Source: PubMed Central journal article supplement (PMC6548422; doi:10.1371/journal.pone.0215031), 2019-06-04
Supplement: pone.0215031.s004.pdf [file pone.0215031.s004.pdf]

## SIINFEKL specific CD8<sup>+</sup> T cells

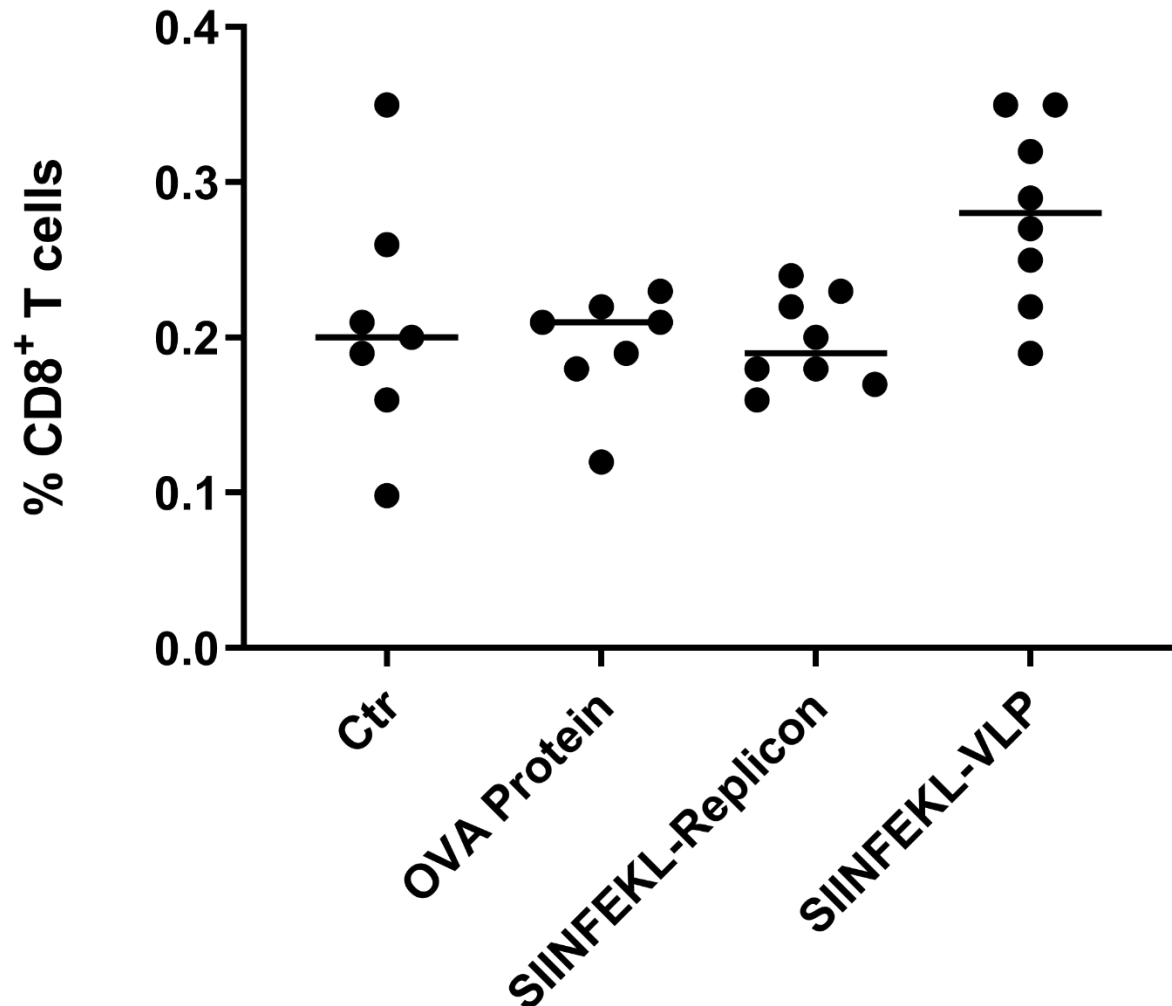

**Figure S4. Low frequency of H-2Kb/SIINFEKL-specific CD8<sup>+</sup> T cells in mice vaccinated only one time.** The fraction of SIINFEKL specific T-cells in spleen samples, collected one week following a one time only vaccination, was determined by flow cytometry. The graph shows scatter plots for single vaccinations with negative control (“Ctr”, 100  $\mu$ L of buffer solution) positive control (50  $\mu$ g of “OVA Protein”), 100  $\mu$ g of SIINFEKL replicon RNA and 100  $\mu$ g of SIINFEKL-VLPs. The difference of less than 0.1% between the SIINFEKL-VLP outcome and that for the negative control is to be contrasted with the 0.4% difference found for the multiple-boost vaccination with the same VLPs (see Figure 7). To compare all groups an Anova test was performed together with a Dunnett’s test to correct for multiple comparisons ( $p= 0.0484$ ) between the “Ctr” and the “SIINFEKL-VLP” groups.
